# Supplementary material for: Biased alternative polyadenylation in human tissues
Source: PubMed Central journal article supplement (PMC1414089; doi:10.1186/gb-2005-6-12-r100), 2005-11-28

## **ADDITIONAL DATA FILE 1**

**Supplemental Table 1.** Tissues, cDNA libraries, genes, ESTs, and poly(A) sites used in this study.

**Supplemental Table 2.** Poly(A) site usage of type II genes.

**Supplemental Table 3.** Poly(A) site usage of type III genes.

**Supplemental Table 4.** Usage of strong and weak poly(A) sites using 60% as cutoff.

**Supplemental Table 5.** Usage of strong and weak poly(A) sites using 75% as cutoff.

**Supplemental Table 6.** Usage of strong and weak poly(A) sites using 90% as cutoff.

**Supplemental Figure 1.** Schematic representation of three types of genes.

**Supplemental Figure 2.** Boxplots of mRNA expression levels of polyadenylation-related factors in brain tissues versus other tissues. (A) U95Av2 data. (B) U133A data. For each plot, values from brain tissues are on the left, and those from other tissues are on the right.

**Supplemental Figure 3.** Selection of hexamers in different poly(A) regions. (A) –100/-41, (B) –40/-1, (C) +1/+40, and (D) +41/+100. For each panel, a two-dimensional scatter-plot for  $z_{un}$  and  $z_{pc}$  is shown on the left, and clustering of hexamers is shown on the right. In each scatter-plot, x-axis is  $z_{un}$ , and y-axis is  $z_{pc}$ . Each dot represents a hexamer. Cutoffs of 2.5 were used for both  $z_{un}$  and  $z_{pc}$ , as indicated by vertical and horizontal lines, respectively. Hexamers in green are the ones with  $z_{sw} > 2.5$ . Hexamers in red are the selected ones for clustering. Sequence logos of *cis* elements are shown under corresponding hexamer groups.

**Supplemental Figure 4.** Multiple sequence alignments of PTB and nPTB (A), and CstfF-64 and  $\tau$ CstF-64 (B). Only the isoform a of PTB (NP\_002810) was used here. ClustalW was used to align protein sequences with default settings. Identical residues in the alignment are marked with asterisks “\*”; strongly and weakly conserved residues are marked with colons “:” and periods “.”, respectively. The protein sequence accessions for nPTB, CstfF-64 and  $\tau$ CstF-64 are NP\_067013, NP\_001316, and NP\_056050, respectively.

**Supplemental Table 1. Tissues, cDNA libraries, genes, ESTs, and poly(A) sites used in this study.**

| <b>Tissue</b>                                                                   | <b># of lib</b> | <b># of genes</b> | <b># of ESTs</b> | <b># of PA</b> |  |  |  |
|---------------------------------------------------------------------------------|-----------------|-------------------|------------------|----------------|--|--|--|
| adipose                                                                         | 3               | 115               | 137              | 115            |  |  |  |
| adrenal cortex                                                                  | 2               | 269               | 321              | 273            |  |  |  |
| blood                                                                           | 28              | 747               | 1903             | 791            |  |  |  |
| bone                                                                            | 8               | 3944              | 11057            | 4454           |  |  |  |
| bone marrow                                                                     | 10              | 1337              | 3535             | 1410           |  |  |  |
| brain                                                                           | 48              | 2226              | 5717             | 2355           |  |  |  |
| cerebrum                                                                        | 13              | 251               | 321              | 253            |  |  |  |
| cervix                                                                          | 5               | 811               | 1372             | 833            |  |  |  |
| colon                                                                           | 50              | 1795              | 3039             | 1881           |  |  |  |
| ear                                                                             | 1               | 1213              | 2576             | 1283           |  |  |  |
| endocrine                                                                       | 5               | 569               | 875              | 580            |  |  |  |
| esophagus                                                                       | 1               | 302               | 356              | 304            |  |  |  |
| eye                                                                             | 14              | 3626              | 8896             | 3989           |  |  |  |
| genitourinary                                                                   | 6               | 382               | 446              | 390            |  |  |  |
| germ cell                                                                       | 4               | 415               | 522              | 421            |  |  |  |
| head and neck                                                                   | 34              | 726               | 1205             | 740            |  |  |  |
| heart                                                                           | 7               | 46                | 64               | 47             |  |  |  |
| kidney                                                                          | 14              | 1533              | 2692             | 1605           |  |  |  |
| liver                                                                           | 13              | 1380              | 3617             | 1460           |  |  |  |
| lung                                                                            | 31              | 2859              | 8012             | 3068           |  |  |  |
| lymph/lymph node                                                                | 8               | 1299              | 2425             | 1343           |  |  |  |
| mammary gland                                                                   | 37              | 507               | 1721             | 513            |  |  |  |
| muscle                                                                          | 7               | 1302              | 2474             | 1354           |  |  |  |
| nervous                                                                         | 9               | 276               | 315              | 282            |  |  |  |
| ovary                                                                           | 25              | 2035              | 5596             | 2133           |  |  |  |
| pancreas                                                                        | 13              | 2541              | 5566             | 2718           |  |  |  |
| pancreatic islet                                                                | 6               | 2509              | 9769             | 2759           |  |  |  |
| peripheral nervous system                                                       | 6               | 984               | 1276             | 1007           |  |  |  |
| pineal gland                                                                    | 2               | 154               | 185              | 155            |  |  |  |
| pituitary gland                                                                 | 5               | 157               | 259              | 158            |  |  |  |
| placenta                                                                        | 28              | 3690              | 8539             | 4092           |  |  |  |
| prostate                                                                        | 32              | 2044              | 5505             | 2183           |  |  |  |
| retina                                                                          | 10              | 3117              | 5697             | 3367           |  |  |  |
| skin                                                                            | 17              | 2280              | 6753             | 2436           |  |  |  |
| soft tissue                                                                     | 5               | 537               | 681              | 545            |  |  |  |
| spleen                                                                          | 3               | 263               | 415              | 267            |  |  |  |
| stomach                                                                         | 34              | 2569              | 5284             | 2736           |  |  |  |
| testis                                                                          | 11              | 1168              | 1854             | 1218           |  |  |  |
| thymus                                                                          | 1               | 18                | 18               | 18             |  |  |  |
| thyroid                                                                         | 30              | 387               | 558              | 394            |  |  |  |
| uterus                                                                          | 16              | 4253              | 10844            | 4775           |  |  |  |
| vascular                                                                        | 7               | 356               | 548              | 363            |  |  |  |
|                                                                                 |                 |                   |                  |                |  |  |  |
| <b># of lib: number of non-normalized libraries</b>                             |                 |                   |                  |                |  |  |  |
| <b># of genes: number of genes studied</b>                                      |                 |                   |                  |                |  |  |  |
| <b># of ESTs: number of poly(A/T)-tailed ESTs from non-normalized libraries</b> |                 |                   |                  |                |  |  |  |
| <b># of PA: number of poly(A) sites</b>                                         |                 |                   |                  |                |  |  |  |

**Supplemental Table 2. Poly(A) site usage of type II genes.**

| Tissue                                                                                             | # of genes | # of ESTs | Vf     | Vm     | VI     | Pf   | Pm   | PI   | Df    | Dm    | DI    | Pval     |
|----------------------------------------------------------------------------------------------------|------------|-----------|--------|--------|--------|------|------|------|-------|-------|-------|----------|
| adipose                                                                                            | 48         | 59        | 19     | 9      | 20     | 0.40 | 0.19 | 0.42 | 0.19  | -0.07 | -0.11 | 6.31E-01 |
| adrenal cortex                                                                                     | 108        | 123       | 29.5   | 25     | 53.5   | 0.27 | 0.23 | 0.50 | -0.18 | 0.15  | 0.06  | 4.16E-01 |
| blood                                                                                              | 267        | 797       | 120.39 | 52.46  | 94.15  | 0.45 | 0.20 | 0.35 | 0.36  | -0.03 | -0.25 | 6.99E-05 |
| bone                                                                                               | 1476       | 4404      | 464.85 | 296.12 | 715.03 | 0.31 | 0.20 | 0.48 | -0.05 | -0.01 | 0.03  | 3.62E-01 |
| bone marrow                                                                                        | 554        | 1407      | 156    | 136.53 | 261.47 | 0.28 | 0.25 | 0.47 | -0.15 | 0.22  | 0.01  | 7.77E-03 |
| brain                                                                                              | 794        | 1969      | 239.44 | 147.82 | 406.74 | 0.30 | 0.19 | 0.51 | -0.09 | -0.08 | 0.09  | 4.26E-02 |
| cerebrum                                                                                           | 96         | 116       | 21.5   | 19.5   | 55     | 0.22 | 0.20 | 0.57 | -0.33 | 0.01  | 0.22  | 6.16E-02 |
| cervix                                                                                             | 317        | 498       | 109.47 | 73.58  | 133.95 | 0.35 | 0.23 | 0.42 | 0.04  | 0.15  | -0.10 | 2.14E-01 |
| colon                                                                                              | 689        | 1122      | 233.52 | 120.2  | 335.28 | 0.34 | 0.17 | 0.49 | 0.02  | -0.14 | 0.04  | 2.12E-01 |
| ear                                                                                                | 534        | 1272      | 129.33 | 134.22 | 270.45 | 0.24 | 0.25 | 0.51 | -0.27 | 0.25  | 0.08  | 2.70E-05 |
| endocrine                                                                                          | 234        | 337       | 79.27  | 42.23  | 112.5  | 0.34 | 0.18 | 0.48 | 0.02  | -0.11 | 0.02  | 7.31E-01 |
| esophagus                                                                                          | 91         | 110       | 28     | 24     | 39     | 0.31 | 0.26 | 0.43 | -0.07 | 0.31  | -0.09 | 3.31E-01 |
| eye                                                                                                | 1285       | 3207      | 444.93 | 264.81 | 575.26 | 0.35 | 0.21 | 0.45 | 0.04  | 0.02  | -0.05 | 3.37E-01 |
| genitourinary                                                                                      | 159        | 188       | 50.83  | 41     | 67.17  | 0.32 | 0.26 | 0.42 | -0.04 | 0.28  | -0.10 | 1.93E-01 |
| germ cell                                                                                          | 144        | 188       | 55.45  | 24.75  | 63.8   | 0.39 | 0.17 | 0.44 | 0.16  | -0.15 | -0.06 | 3.55E-01 |
| head and neck                                                                                      | 276        | 451       | 94.75  | 52.33  | 128.92 | 0.34 | 0.19 | 0.47 | 0.03  | -0.06 | 0.00  | 8.55E-01 |
| heart                                                                                              | 13         | 14        | 6      | 0      | 7      | 0.46 | 0.00 | 0.54 | 0.39  | -1.00 | 0.15  | 1.82E-01 |
| kidney                                                                                             | 581        | 1003      | 181.81 | 112.83 | 286.36 | 0.31 | 0.19 | 0.49 | -0.06 | -0.04 | 0.05  | 4.73E-01 |
| liver                                                                                              | 510        | 1287      | 179.63 | 108.86 | 221.51 | 0.35 | 0.21 | 0.43 | 0.06  | 0.06  | -0.07 | 3.18E-01 |
| lung                                                                                               | 995        | 2705      | 349.04 | 186.12 | 459.84 | 0.35 | 0.19 | 0.46 | 0.06  | -0.07 | -0.02 | 3.26E-01 |
| lymph node                                                                                         | 505        | 958       | 167.09 | 116.3  | 221.61 | 0.33 | 0.23 | 0.44 | 0.00  | 0.14  | -0.07 | 2.20E-01 |
| mammary gland                                                                                      | 188        | 549       | 59.59  | 36     | 92.41  | 0.32 | 0.19 | 0.49 | -0.05 | -0.05 | 0.05  | 8.08E-01 |
| muscle                                                                                             | 484        | 877       | 155.1  | 98.34  | 230.57 | 0.32 | 0.20 | 0.48 | -0.04 | 0.01  | 0.01  | 8.81E-01 |
| nervous                                                                                            | 116        | 137       | 23.67  | 30.33  | 62     | 0.20 | 0.26 | 0.53 | -0.39 | 0.30  | 0.14  | 1.22E-02 |
| ovary                                                                                              | 754        | 1987      | 290.11 | 160.77 | 303.12 | 0.38 | 0.21 | 0.40 | 0.16  | 0.06  | -0.14 | 8.83E-04 |
| pancreas                                                                                           | 950        | 2226      | 293.09 | 199.88 | 457.03 | 0.31 | 0.21 | 0.48 | -0.07 | 0.04  | 0.02  | 3.31E-01 |
| pancreatic islet                                                                                   | 1003       | 3765      | 275.13 | 216.25 | 511.61 | 0.27 | 0.22 | 0.51 | -0.17 | 0.07  | 0.09  | 6.87E-04 |
| peripheral nervous system                                                                          | 353        | 444       | 112.33 | 67     | 173.67 | 0.32 | 0.19 | 0.49 | -0.04 | -0.06 | 0.05  | 6.56E-01 |
| pineal gland                                                                                       | 58         | 74        | 20.5   | 11.5   | 26     | 0.35 | 0.20 | 0.45 | 0.06  | -0.02 | -0.04 | 9.33E-01 |
| pituitary gland                                                                                    | 57         | 82        | 20     | 14     | 23     | 0.35 | 0.25 | 0.40 | 0.06  | 0.22  | -0.14 | 5.69E-01 |
| placenta                                                                                           | 1428       | 3066      | 511.66 | 315.95 | 600.39 | 0.36 | 0.22 | 0.42 | 0.08  | 0.10  | -0.10 | 1.59E-03 |
| prostate                                                                                           | 808        | 2069      | 267.26 | 167.68 | 373.06 | 0.33 | 0.21 | 0.46 | 0.00  | 0.03  | -0.02 | 8.90E-01 |
| retina                                                                                             | 1106       | 2021      | 419.34 | 213.41 | 473.26 | 0.38 | 0.19 | 0.43 | 0.14  | -0.04 | -0.09 | 2.66E-03 |
| skin                                                                                               | 852        | 2396      | 286.6  | 166.91 | 398.49 | 0.34 | 0.20 | 0.47 | 0.01  | -0.03 | 0.00  | 9.04E-01 |
| soft tissue                                                                                        | 206        | 258       | 55.6   | 38.4   | 112    | 0.27 | 0.19 | 0.54 | -0.19 | -0.08 | 0.16  | 7.93E-02 |
| spleen                                                                                             | 82         | 118       | 27.8   | 13.2   | 41     | 0.34 | 0.16 | 0.50 | 0.02  | -0.20 | 0.07  | 6.52E-01 |
| stomach                                                                                            | 999        | 2137      | 325.36 | 195.85 | 477.78 | 0.33 | 0.20 | 0.48 | -0.02 | -0.03 | 0.02  | 7.95E-01 |
| testis                                                                                             | 436        | 686       | 160.61 | 94.33  | 181.06 | 0.37 | 0.22 | 0.42 | 0.11  | 0.07  | -0.12 | 8.64E-02 |
| thymus                                                                                             | 6          | 6         | 2      | 1      | 3      | 0.33 | 0.17 | 0.50 | 0.00  | -0.17 | 0.07  | 9.76E-01 |
| thyroid                                                                                            | 162        | 214       | 52     | 34     | 76     | 0.32 | 0.21 | 0.47 | -0.03 | 0.04  | 0.00  | 9.46E-01 |
| uterus                                                                                             | 1607       | 4300      | 487.28 | 365.07 | 754.65 | 0.30 | 0.23 | 0.47 | -0.09 | 0.13  | 0.00  | 1.04E-02 |
| vascular                                                                                           | 156        | 221       | 61.2   | 30.5   | 64.3   | 0.39 | 0.20 | 0.41 | 0.18  | -0.03 | -0.12 | 2.44E-01 |
| <b># of genes: number of genes studied</b>                                                         |            |           |        |        |        |      |      |      |       |       |       |          |
| <b># of ESTs: number of poly(A/T)-tailed ESTs from non-normalized libraries</b>                    |            |           |        |        |        |      |      |      |       |       |       |          |
| <b>Vf, Vm, and VI: votes for 2F, 2M, and 2L poly(A) sites, respectively</b>                        |            |           |        |        |        |      |      |      |       |       |       |          |
| <b>Pf, Pm, and PI: percent of usage of 2F, 2M, and 2L poly(A) sites, respectively</b>              |            |           |        |        |        |      |      |      |       |       |       |          |
| <b>Df, Dm, and DI: distance to the median usage for 2F, 2M, and 2L poly(A) sites, respectively</b> |            |           |        |        |        |      |      |      |       |       |       |          |
| <b>Pval: p-value from Chi-squared test</b>                                                         |            |           |        |        |        |      |      |      |       |       |       |          |



**Supplemental Table 4. Usage of strong and weak poly(A) sites using 60% as cutoff**

| <b>Tissue</b>                                                                                  | <b># of genes</b> | <b># of ESTs</b> | <b>Vs</b> | <b>Vw</b> | <b>Ps</b> | <b>Pw</b> | <b>Ds</b> | <b>Dw</b> | <b>Pval</b> |
|------------------------------------------------------------------------------------------------|-------------------|------------------|-----------|-----------|-----------|-----------|-----------|-----------|-------------|
| adipose                                                                                        | 38                | 48               | 34.00     | 4.00      | 0.89      | 0.11      | 0.07      | -0.36     | 3.23E-01    |
| adrenal cortex                                                                                 | 90                | 110              | 78.00     | 12.00     | 0.87      | 0.13      | 0.04      | -0.19     | 4.22E-01    |
| blood                                                                                          | 226               | 589              | 185.03    | 40.97     | 0.82      | 0.18      | -0.02     | 0.10      | 5.02E-01    |
| bone                                                                                           | 1019              | 4195             | 829.78    | 189.22    | 0.81      | 0.19      | -0.03     | 0.13      | 7.08E-02    |
| bone marrow                                                                                    | 461               | 1516             | 397.09    | 63.91     | 0.86      | 0.14      | 0.03      | -0.16     | 1.31E-01    |
| brain                                                                                          | 582               | 1733             | 479.79    | 102.21    | 0.82      | 0.18      | -0.01     | 0.07      | 4.78E-01    |
| cerebrum                                                                                       | 93                | 112              | 77.00     | 16.00     | 0.83      | 0.17      | -0.01     | 0.04      | 8.49E-01    |
| cervix                                                                                         | 251               | 487              | 214.15    | 36.85     | 0.85      | 0.15      | 0.02      | -0.11     | 4.45E-01    |
| colon                                                                                          | 522               | 1005             | 433.76    | 88.24     | 0.83      | 0.17      | -0.01     | 0.03      | 7.89E-01    |
| ear                                                                                            | 433               | 1130             | 363.49    | 69.51     | 0.84      | 0.16      | 0.00      | -0.03     | 8.15E-01    |
| endocrine                                                                                      | 199               | 299              | 171.17    | 27.83     | 0.86      | 0.14      | 0.03      | -0.15     | 3.45E-01    |
| esophagus                                                                                      | 77                | 96               | 61.17     | 15.83     | 0.79      | 0.21      | -0.05     | 0.25      | 3.33E-01    |
| eye                                                                                            | 898               | 2756             | 671.49    | 226.51    | 0.75      | 0.25      | -0.10     | 0.53      | 1.52E-12    |
| genitourinary                                                                                  | 112               | 146              | 98.97     | 13.03     | 0.88      | 0.12      | 0.06      | -0.29     | 1.68E-01    |
| germ cell                                                                                      | 138               | 201              | 121.30    | 16.70     | 0.88      | 0.12      | 0.05      | -0.27     | 1.66E-01    |
| head and neck                                                                                  | 227               | 417              | 192.75    | 34.25     | 0.85      | 0.15      | 0.02      | -0.08     | 5.75E-01    |
| heart                                                                                          | 16                | 18               | 13.00     | 3.00      | 0.81      | 0.19      | -0.03     | 0.14      | 8.06E-01    |
| kidney                                                                                         | 444               | 888              | 368.80    | 75.20     | 0.83      | 0.17      | -0.01     | 0.03      | 7.91E-01    |
| liver                                                                                          | 407               | 1387             | 336.78    | 70.22     | 0.83      | 0.17      | -0.01     | 0.05      | 6.70E-01    |
| lung                                                                                           | 742               | 2561             | 619.08    | 122.92    | 0.83      | 0.17      | 0.00      | 0.01      | 9.44E-01    |
| lymph node                                                                                     | 384               | 863              | 313.17    | 70.83     | 0.82      | 0.18      | -0.02     | 0.12      | 2.97E-01    |
| mammary gland                                                                                  | 167               | 343              | 143.83    | 23.17     | 0.86      | 0.14      | 0.03      | -0.16     | 3.66E-01    |
| muscle                                                                                         | 349               | 760              | 290.98    | 58.02     | 0.83      | 0.17      | 0.00      | 0.01      | 9.38E-01    |
| nervous                                                                                        | 87                | 110              | 75.17     | 11.83     | 0.86      | 0.14      | 0.03      | -0.17     | 4.70E-01    |
| ovary                                                                                          | 535               | 1476             | 445.82    | 89.18     | 0.83      | 0.17      | 0.00      | 0.01      | 9.01E-01    |
| pancreas                                                                                       | 707               | 1955             | 603.82    | 103.18    | 0.85      | 0.15      | 0.02      | -0.11     | 1.79E-01    |
| pancreatic islet                                                                               | 694               | 3437             | 571.21    | 122.79    | 0.82      | 0.18      | -0.01     | 0.07      | 3.85E-01    |
| peripheral nervous system                                                                      | 286               | 403              | 239.17    | 46.83     | 0.84      | 0.16      | 0.00      | -0.01     | 9.65E-01    |
| pineal gland                                                                                   | 46                | 64               | 41.00     | 5.00      | 0.89      | 0.11      | 0.07      | -0.34     | 3.06E-01    |
| pituitary gland                                                                                | 56                | 76               | 45.67     | 10.33     | 0.82      | 0.18      | -0.02     | 0.12      | 6.90E-01    |
| placenta                                                                                       | 913               | 2224             | 688.29    | 224.71    | 0.75      | 0.25      | -0.10     | 0.49      | 3.29E-11    |
| prostate                                                                                       | 601               | 2015             | 506.66    | 94.34     | 0.84      | 0.16      | 0.01      | -0.05     | 6.09E-01    |
| retina                                                                                         | 700               | 1426             | 478.71    | 221.29    | 0.68      | 0.32      | -0.18     | 0.92      | 3.38E-27    |
| skin                                                                                           | 645               | 2354             | 526.08    | 118.92    | 0.82      | 0.18      | -0.02     | 0.12      | 1.78E-01    |
| soft tissue                                                                                    | 172               | 234              | 147.42    | 24.58     | 0.86      | 0.14      | 0.03      | -0.13     | 4.41E-01    |
| spleen                                                                                         | 81                | 126              | 71.13     | 9.87      | 0.88      | 0.12      | 0.05      | -0.26     | 2.98E-01    |
| stomach                                                                                        | 706               | 1798             | 592.65    | 113.35    | 0.84      | 0.16      | 0.00      | -0.03     | 7.66E-01    |
| testis                                                                                         | 339               | 658              | 272.58    | 66.42     | 0.80      | 0.20      | -0.04     | 0.19      | 1.21E-01    |
| thymus                                                                                         | 6                 | 6                | 6.00      | 0.00      | 1.00      | 0.00      | 0.20      | -1.00     | 2.77E-01    |
| thyroid                                                                                        | 132               | 186              | 111.25    | 20.75     | 0.84      | 0.16      | 0.01      | -0.05     | 8.16E-01    |
| uterus                                                                                         | 1062              | 3835             | 848.95    | 213.05    | 0.80      | 0.20      | -0.04     | 0.22      | 1.60E-03    |
| vascular                                                                                       | 144               | 230              | 128.52    | 15.48     | 0.89      | 0.11      | 0.07      | -0.35     | 6.42E-02    |
| <b># of genes: number of genes studied</b>                                                     |                   |                  |           |           |           |           |           |           |             |
| <b># of ESTs: number of poly(A/T)-tailed ESTs from non-normalized libraries</b>                |                   |                  |           |           |           |           |           |           |             |
| <b>Vs and Vw: votes for strong and weak poly(A) sites, respectively</b>                        |                   |                  |           |           |           |           |           |           |             |
| <b>Ps and Pw: percent of usage of strong and weak poly(A) sites, respectively</b>              |                   |                  |           |           |           |           |           |           |             |
| <b>Ds and Dw, distance to the median usage for strong and weak poly(A) sites, respectively</b> |                   |                  |           |           |           |           |           |           |             |
| <b>Pval: p-value from Chi-squared test</b>                                                     |                   |                  |           |           |           |           |           |           |             |



| <b>Supplemental Table 6. Usage of strong and weak poly(A) sites using 90% as cutoff</b>        |                   |                  |           |           |           |           |           |           |             |
|------------------------------------------------------------------------------------------------|-------------------|------------------|-----------|-----------|-----------|-----------|-----------|-----------|-------------|
| <b>Tissue</b>                                                                                  | <b># of genes</b> | <b># of ESTs</b> | <b>Vs</b> | <b>Vw</b> | <b>Ps</b> | <b>Pw</b> | <b>Ds</b> | <b>Dw</b> | <b>Pval</b> |
| adipose                                                                                        | 19                | 27               | 19.00     | 0.00      | 1.00      | 0.00      | 0.04      | -1.00     | 3.60E-01    |
| adrenal cortex                                                                                 | 36                | 49               | 34.50     | 1.50      | 0.96      | 0.04      | 0.00      | -0.01     | 9.88E-01    |
| blood                                                                                          | 91                | 379              | 86.31     | 4.69      | 0.95      | 0.05      | -0.01     | 0.22      | 6.56E-01    |
| bone                                                                                           | 225               | 2143             | 215.40    | 9.60      | 0.96      | 0.04      | 0.00      | 0.01      | 9.70E-01    |
| bone marrow                                                                                    | 135               | 914              | 130.98    | 4.02      | 0.97      | 0.03      | 0.01      | -0.29     | 4.74E-01    |
| brain                                                                                          | 167               | 966              | 160.25    | 6.75      | 0.96      | 0.04      | 0.00      | -0.04     | 9.11E-01    |
| cerebrum                                                                                       | 28                | 40               | 28.00     | 0.00      | 1.00      | 0.00      | 0.04      | -1.00     | 2.67E-01    |
| cervix                                                                                         | 92                | 266              | 89.05     | 2.95      | 0.97      | 0.03      | 0.01      | -0.24     | 6.30E-01    |
| colon                                                                                          | 142               | 445              | 136.88    | 5.12      | 0.96      | 0.04      | 0.01      | -0.14     | 7.17E-01    |
| ear                                                                                            | 112               | 527              | 110.39    | 1.61      | 0.99      | 0.01      | 0.03      | -0.66     | 1.43E-01    |
| endocrine                                                                                      | 88                | 148              | 84.00     | 4.00      | 0.95      | 0.05      | 0.00      | 0.08      | 8.78E-01    |
| esophagus                                                                                      | 28                | 39               | 25.00     | 3.00      | 0.89      | 0.11      | -0.07     | 1.54      | 8.71E-02    |
| eye                                                                                            | 196               | 1118             | 176.39    | 19.61     | 0.90      | 0.10      | -0.06     | 1.37      | 5.52E-05    |
| genitourinary                                                                                  | 43                | 63               | 40.50     | 2.50      | 0.94      | 0.06      | -0.02     | 0.38      | 6.02E-01    |
| germ cell                                                                                      | 60                | 112              | 58.55     | 1.45      | 0.98      | 0.02      | 0.02      | -0.43     | 4.88E-01    |
| head and neck                                                                                  | 103               | 261              | 99.42     | 3.58      | 0.97      | 0.03      | 0.01      | -0.18     | 7.08E-01    |
| heart                                                                                          | 8                 | 9                | 8.00      | 0.00      | 1.00      | 0.00      | 0.04      | -1.00     | 5.53E-01    |
| kidney                                                                                         | 152               | 458              | 143.97    | 8.03      | 0.95      | 0.05      | -0.01     | 0.25      | 5.13E-01    |
| liver                                                                                          | 139               | 815              | 131.03    | 7.97      | 0.94      | 0.06      | -0.02     | 0.36      | 3.73E-01    |
| lung                                                                                           | 205               | 1435             | 194.64    | 10.36     | 0.95      | 0.05      | -0.01     | 0.20      | 5.51E-01    |
| lymph node                                                                                     | 111               | 478              | 103.76    | 7.24      | 0.93      | 0.07      | -0.02     | 0.55      | 2.27E-01    |
| mammary gland                                                                                  | 74                | 225              | 70.33     | 3.67      | 0.95      | 0.05      | -0.01     | 0.18      | 7.51E-01    |
| muscle                                                                                         | 104               | 412              | 99.89     | 4.11      | 0.96      | 0.04      | 0.00      | -0.06     | 8.93E-01    |
| nervous                                                                                        | 27                | 43               | 25.67     | 1.33      | 0.95      | 0.05      | -0.01     | 0.17      | 8.54E-01    |
| ovary                                                                                          | 163               | 822              | 154.20    | 8.80      | 0.95      | 0.05      | -0.01     | 0.28      | 4.53E-01    |
| pancreas                                                                                       | 185               | 1021             | 179.88    | 5.12      | 0.97      | 0.03      | 0.02      | -0.34     | 3.27E-01    |
| pancreatic islet                                                                               | 175               | 1835             | 165.67    | 9.33      | 0.95      | 0.05      | -0.01     | 0.26      | 4.63E-01    |
| peripheral nervous system                                                                      | 90                | 155              | 88.50     | 1.50      | 0.98      | 0.02      | 0.03      | -0.60     | 2.29E-01    |
| pineal gland                                                                                   | 16                | 26               | 16.00     | 0.00      | 1.00      | 0.00      | 0.04      | -1.00     | 4.01E-01    |
| pituitary gland                                                                                | 26                | 40               | 24.00     | 2.00      | 0.92      | 0.08      | -0.04     | 0.82      | 3.78E-01    |
| placenta                                                                                       | 197               | 725              | 182.42    | 14.58     | 0.93      | 0.07      | -0.03     | 0.76      | 2.62E-02    |
| prostate                                                                                       | 176               | 1124             | 165.63    | 10.37     | 0.94      | 0.06      | -0.02     | 0.40      | 2.69E-01    |
| retina                                                                                         | 128               | 322              | 111.19    | 16.81     | 0.87      | 0.13      | -0.09     | 2.11      | 5.18E-07    |
| skin                                                                                           | 185               | 1411             | 177.40    | 7.60      | 0.96      | 0.04      | 0.00      | -0.03     | 9.41E-01    |
| soft tissue                                                                                    | 69                | 105              | 65.67     | 3.33      | 0.95      | 0.05      | -0.01     | 0.14      | 8.01E-01    |
| spleen                                                                                         | 40                | 75               | 38.80     | 1.20      | 0.97      | 0.03      | 0.01      | -0.29     | 7.02E-01    |
| stomach                                                                                        | 174               | 824              | 167.85    | 6.15      | 0.96      | 0.04      | 0.01      | -0.16     | 6.54E-01    |
| testis                                                                                         | 94                | 296              | 84.30     | 9.70      | 0.90      | 0.10      | -0.06     | 1.45      | 3.24E-03    |
| thymus                                                                                         | 3                 | 3                | 3.00      | 0.00      | 1.00      | 0.00      | 0.04      | -1.00     | 7.16E-01    |
| thyroid                                                                                        | 57                | 94               | 55.50     | 1.50      | 0.97      | 0.03      | 0.02      | -0.38     | 5.52E-01    |
| uterus                                                                                         | 227               | 1724             | 213.62    | 13.38     | 0.94      | 0.06      | -0.02     | 0.40      | 2.09E-01    |
| vascular                                                                                       | 69                | 132              | 68.00     | 1.00      | 0.99      | 0.01      | 0.03      | -0.66     | 2.53E-01    |
| <b># of genes: number of genes studied</b>                                                     |                   |                  |           |           |           |           |           |           |             |
| <b># of ESTs: number of poly(A/T)-tailed ESTs from non-normalized libraries</b>                |                   |                  |           |           |           |           |           |           |             |
| <b>Vs and Vw: votes for strong and weak poly(A) sites, respectively</b>                        |                   |                  |           |           |           |           |           |           |             |
| <b>Ps and Pw: percent of usage of strong and weak poly(A) sites, respectively</b>              |                   |                  |           |           |           |           |           |           |             |
| <b>Ds and Dw, distance to the median usage for strong and weak poly(A) sites, respectively</b> |                   |                  |           |           |           |           |           |           |             |
| <b>Pval: p-value from Chi-squared test</b>                                                     |                   |                  |           |           |           |           |           |           |             |

# Supplemental Figure 1.

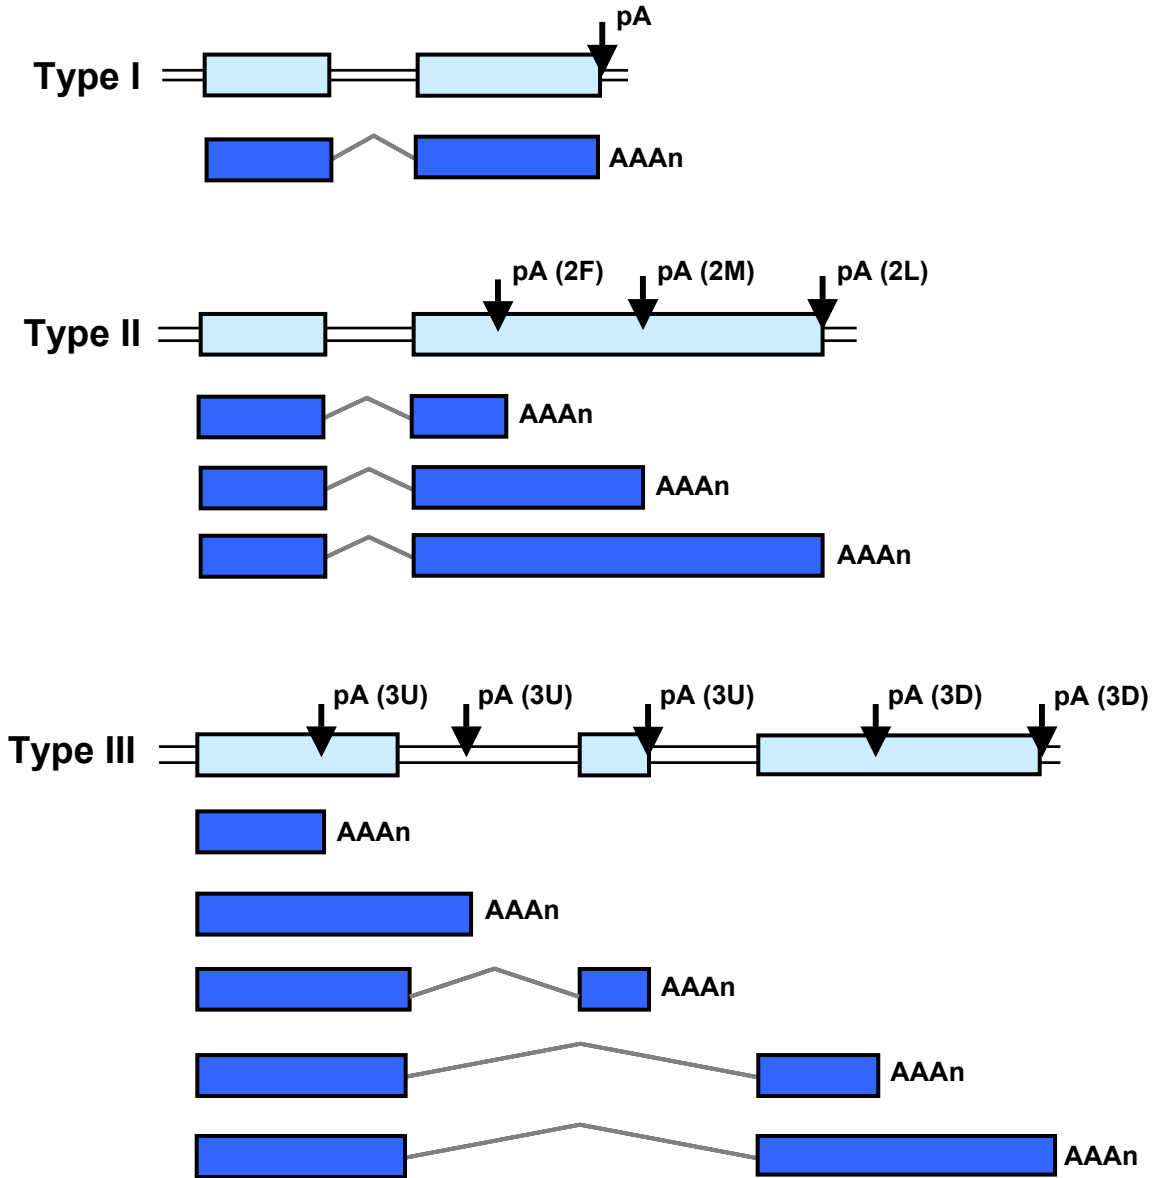



# Supplemental Figure 2.

**A**

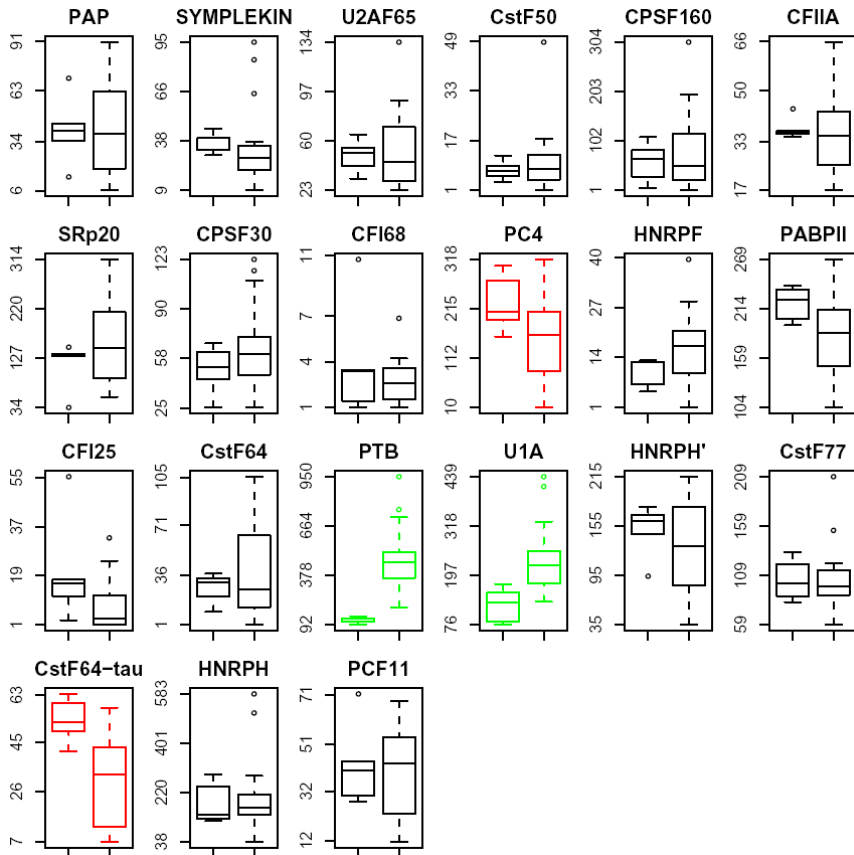

**B**

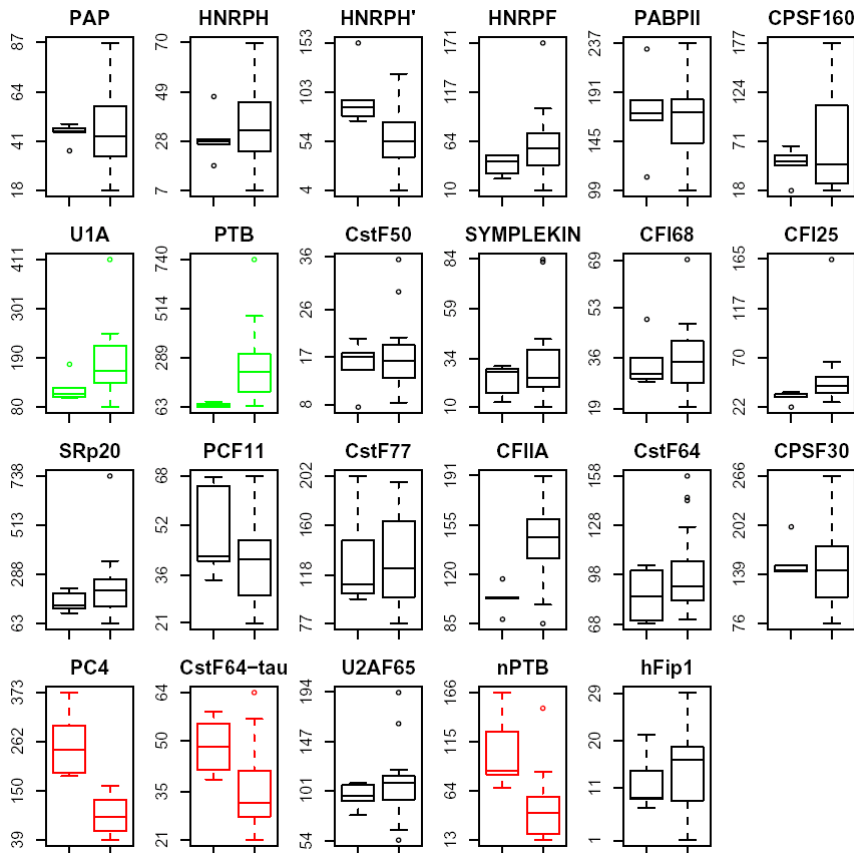

Supplement: gb-2005-6-12-r100-S1.pdf [file gb-2005-6-12-r100-S1.pdf]
